# Supplementary material for: Dye-based chromoendoscopy detects more neoplasia than white light endoscopy in patients with primary sclerosing cholangitis and IBD
Source: PubMed Central journal article supplement — Endosc Int Open. 2024 Nov 11;12(11):E1285–94. doi: 10.1055/a-2437-8102 (PMC11555309; doi:10.1055/a-2437-8102), 2024-11-11
Supplement: 10-1055-a-2437-8102_24382902.pdf [file 10-1055-a-2437-8102_24382902.pdf]

## Supplementary material

1

**Supplementary Table 1** Association between endoscopic technique and neoplasia in UC

| Factor    | Analysis                | Dysplasia – n/N (%) |              | Odds ratio*<br>(95% CI) | P<br>value   |
|-----------|-------------------------|---------------------|--------------|-------------------------|--------------|
|           |                         | Not used            | Used         |                         |              |
| <b>UC</b> |                         |                     |              |                         |              |
| Dye spray | Unadjusted              | 3/116 (3%)          | 22/135 (16%) | 8.10 (1.72-38.2)        | <b>0.008</b> |
|           | Adjusted 1 <sup>†</sup> | -                   | -            | 10.7 (1.44-79.4)        | <b>0.02</b>  |
|           | Adjusted 2 <sup>‡</sup> | -                   | -            | 8.86 (1.33-59.2)        | <b>0.02</b>  |
| HD scope  | Unadjusted              | 11/142 (8%)         | 14/92 (15%)  | 2.14 (0.92-4.94)        | 0.08         |
|           | Adjusted 1 <sup>§</sup> | -                   | -            | 1.54 (0.43-5.51)        | 0.51         |
|           | Adjusted 2 <sup>¶</sup> | -                   | -            | 1.82 (0.48-6.90)        | 0.38         |

\*Odds ratio expressed as odds of dysplasia when dye spray/HD scope used relative to odds when it was not used.

<sup>†</sup>Adjusted for year of procedure and age at IBD diagnosis.

<sup>‡</sup>As Adjusted Analysis 1, plus additional adjustment for use of HD scope.

<sup>§</sup>Adjusted for year of procedure, age of IBD diagnosis, age of PSC diagnosis and bowel prep quality.

<sup>¶</sup>As Adjusted Analysis 1, plus additional adjustment for use of dye spray.

HD, high definition; IBD, inflammatory bowel disease; PSC, primary sclerosing cholangitis; UC, ulcerative colitis.

**Supplementary Table 2** Association between endoscopic technique and neoplasia in CD.

| Factor         | Analysis                | Dysplasia – n/N (%) |              | Odds ratio*<br>(95% CI) | P<br>value |
|----------------|-------------------------|---------------------|--------------|-------------------------|------------|
|                |                         | Not used            | Used         |                         |            |
| <b>Crohn's</b> |                         |                     |              |                         |            |
| Dye spray      | Unadjusted              | 2/39 (5.1%)         | 1/23 (4.4%)  | 0.82 (0.06, 11.2)       | 0.88       |
|                | Adjusted 1 <sup>†</sup> | -                   | -            | 0.71 (0.06, 8.74)       | 0.78       |
|                | Adjusted 2 <sup>‡</sup> | -                   | -            | **                      |            |
| HD scope       | Unadjusted              | 0/32 (0.0%)         | 3/24 (12.5%) | **††                    | 0.07       |
|                | Adjusted 1 <sup>§</sup> | -                   | -            | **                      |            |
|                | Adjusted 2 <sup>¶</sup> | -                   | -            | **                      |            |

\*Odds ratio expressed as odds of dysplasia when dye spray/HD scope used relative to odds when it wasn't used

<sup>†</sup>Adjusted for year of procedure and age of IBD diagnosis

<sup>‡</sup>Adjusted Analysis 1, plus additional adjustment for use of HD scope

<sup>§</sup>Adjusted for year of procedure, age of IBD diagnosis, age of PSC diagnosis and bowel prep quality.

<sup>¶</sup>As Adjusted Analysis 1, plus additional adjustment for use of dye spray.

\*\*Unable to fit model as no cases of dysplasia in patients with HD scope not used.

††Analysis using Fisher's exact test.

CD, Crohn's disease; HD, high definition; IBD, inflammatory bowel disease; PSC, primary sclerosing cholangitis.
